# Supplementary material for: Study on Bulk-Surface Transport Separation and Dielectric Polarization of Topological Insulator Bi1.2Sb0.8Te0.4Se2.6
Source: MDPI journal article supplement (doi:10.3390/molecules29040859), 2024-02-15
Supplement: s1 [file s1]

# Supplemental Material

## Study on Bulk-Surface Transport Separation and Dielectric Polarization of Topological Insulator $\text{Bi}_{1.2}\text{Sb}_{0.8}\text{Te}_{0.4}\text{Se}_{2.6}$

Yueqian Zheng<sup>a</sup>, Tao Xu<sup>a</sup>, Xuan Wang<sup>a, \*</sup>, Zhi Sun<sup>a</sup>, Bai Han<sup>a</sup>

<sup>a</sup> Department of Electric engineering, Harbin University of Science and Technology, 52 Xuefu Rd, Nangang, Harbin, Heilongjiang, 150080, China

\*To whom correspondence may be addressed: Xuan Wang(wangxuan@hrbust.edu.cn)

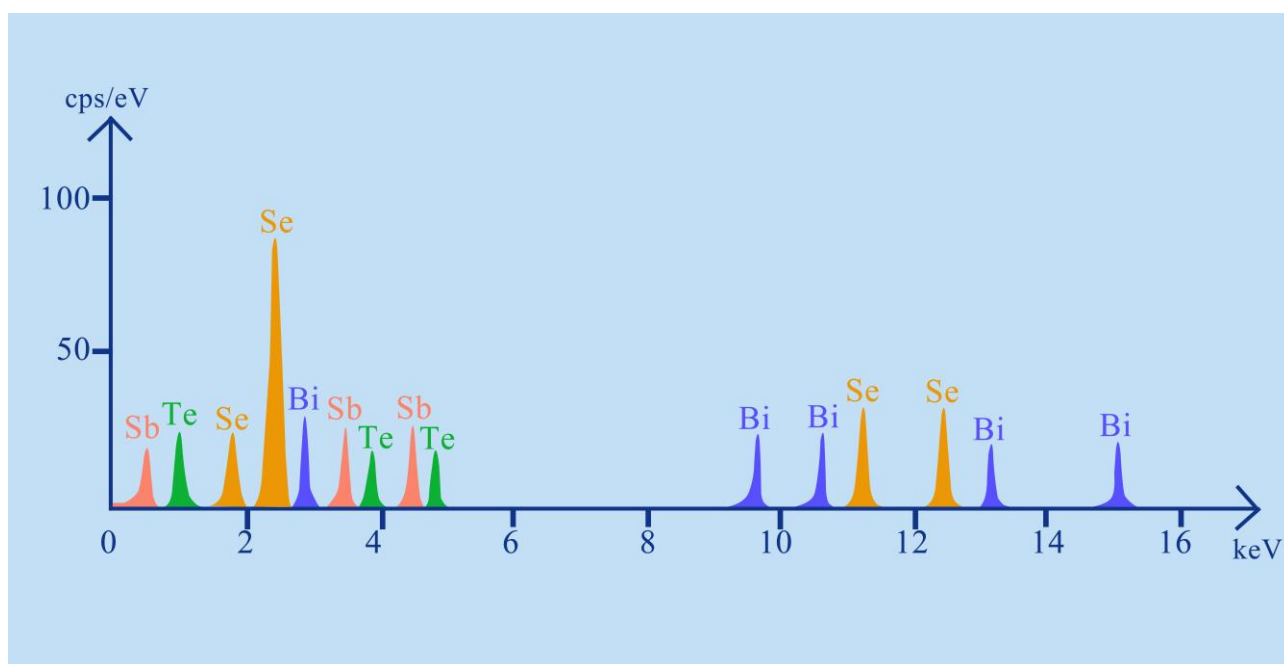

**Figure S1.** Energy-dispersive spectrum of the BSTS sample.

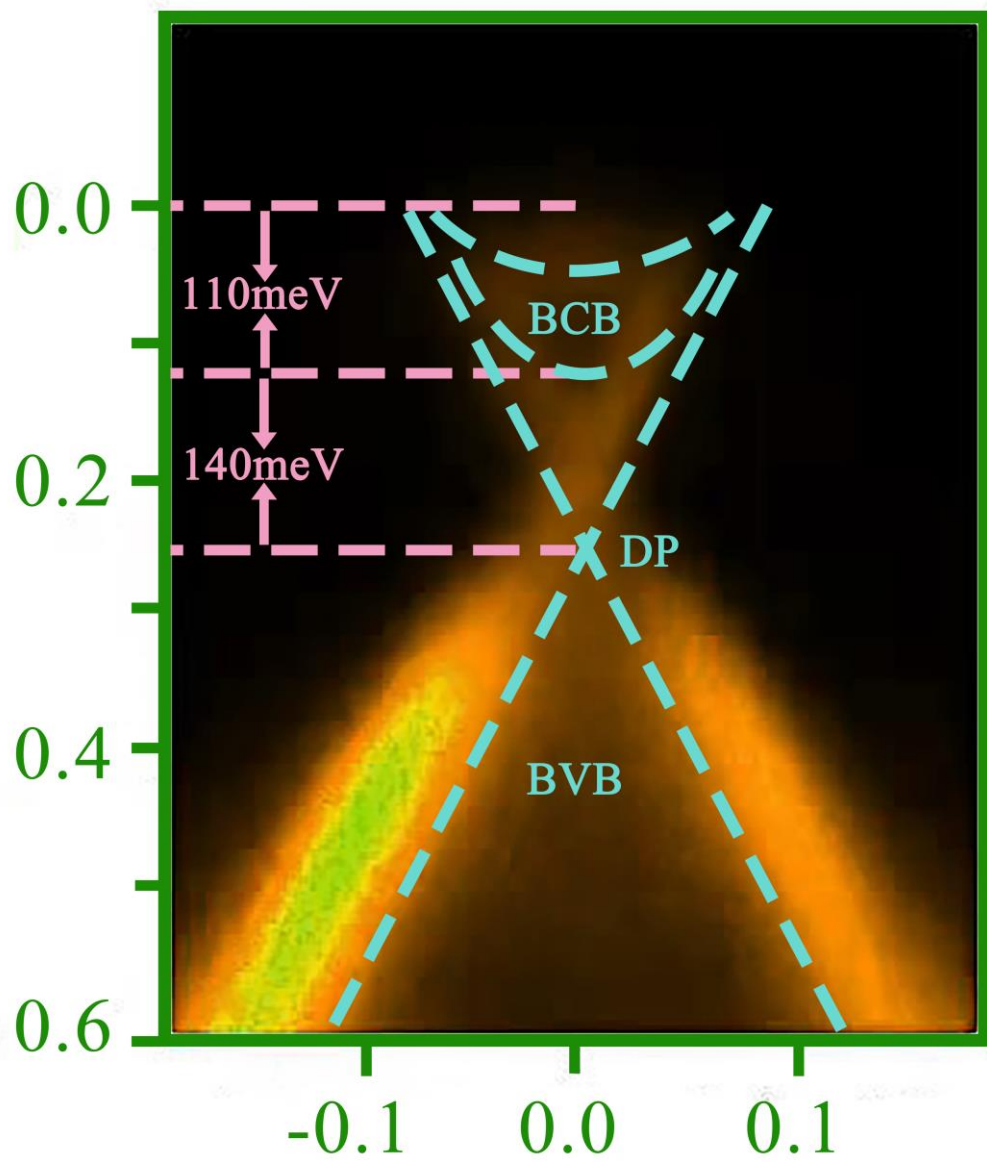

**Figure S2.** Angular-resolved photoemission spectrum of the BSTS sample, exhibiting the characteristic band structure of the "Dirac cone".

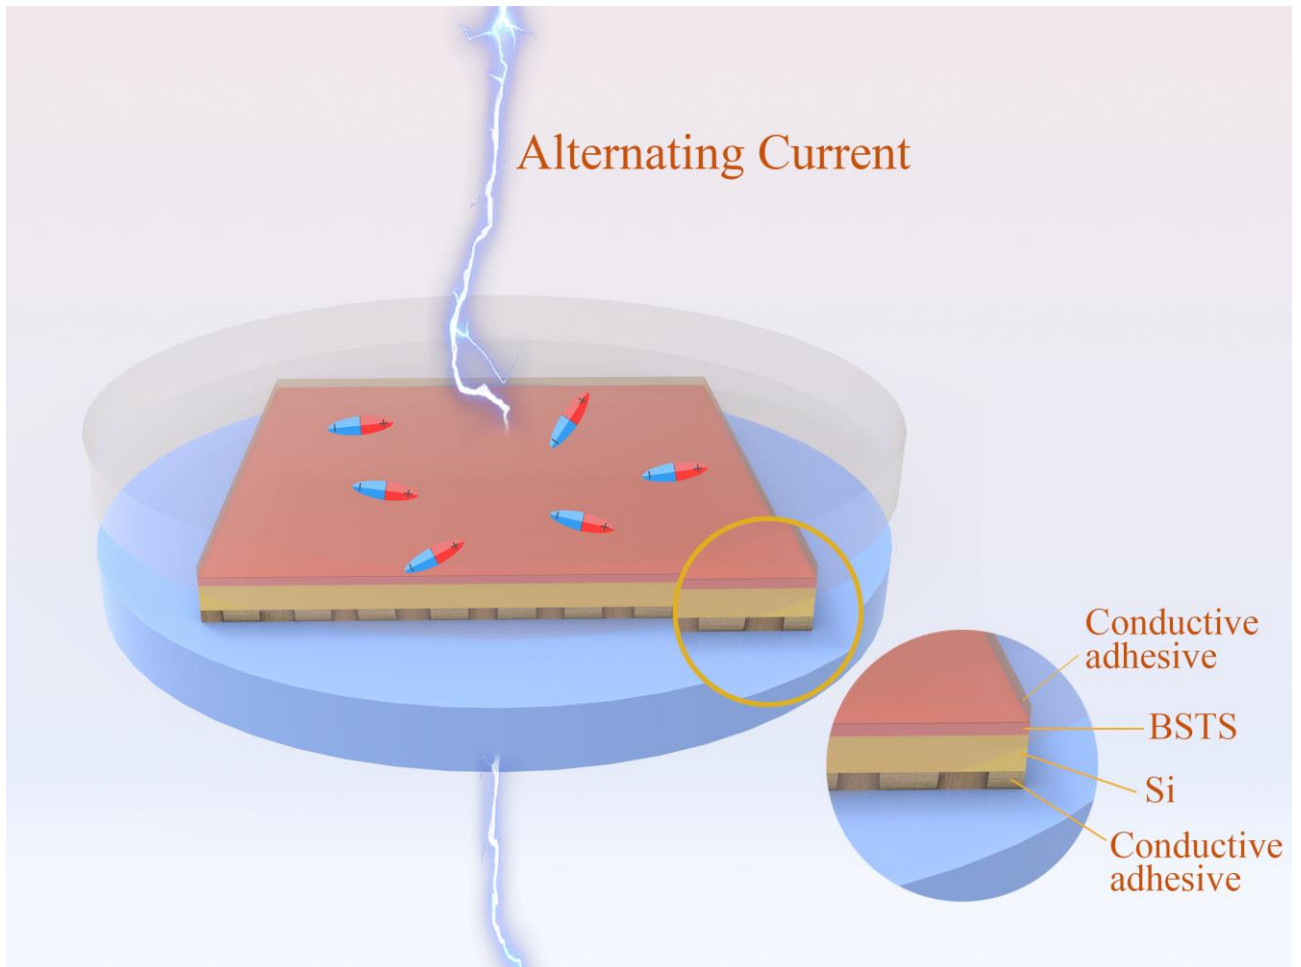

**Figure S3.** Testing principle of Broadband Dielectric Spectroscopy Instrument.
